# Supplementary material
Source: PubMed Central journal article supplement (PMC544437)
Supplement: bmj_330_7483_142__1.pdf [file bmj_330_7483_142__1.pdf]

## Posted as supplied by the authors

### Trials included in the review

- Bernard P, Chosidow O, Vaillant L. Oral pristinamycin versus standard penicillin regimen to treat erysipelas in adults: randomised, non-inferiority, open trial. *BMJ* 2002;325:864.
- Bhandari N, Bahl R, Taneja S, Strand T, Molbak K, Ulvik RJ, et al. Effect of routine zinc supplementation on pneumonia in children aged 6 months to 3 years: randomised controlled trial in an urban slum. *BMJ* 2002;324:1358.
- Bosch J, Yusuf S, Pogue J, Sleight P, Lonn E, Rangoonwala B, et al. Use of ramipril in preventing stroke: double blind randomised trial. *BMJ* 2002;324:699-702.
- Brookes ST, Donovan JL, Peters TJ, Abrams P, Neal DE. Sexual dysfunction in men after treatment for lower urinary tract symptoms: evidence from randomised controlled trial. *BMJ* 2002;324:1059-61.
- Chaudhry S, Schroter S, Smith R, Morris J. Does declaration of competing interests affect readers' perceptions? A randomised trial. *BMJ* 2002;325:1391-2.
- Chiarelli P, Cockburn J. Promoting urinary continence in women after delivery: randomised controlled trial. *BMJ* 2002;324:1241.
- Chiba N, Van Zanten SJ, Sinclair P, Ferguson RA, Escobedo S, Grace E. Treating Helicobacter pylori infection in primary care patients with uninvestigated dyspepsia: the Canadian adult dyspepsia empiric treatment-Helicobacter pylori positive (CADET-Hp) randomised controlled trial. *BMJ* 2002;324:1012-6.
- DAFNE Study Group. Training in flexible, intensive insulin management to enable dietary freedom in people with type 1 diabetes: dose adjustment for normal eating (DAFNE) randomised controlled trial. *BMJ* 2002;325:746.
- Day L, Fildes B, Gordon I, Fitzharris M, Flamer H, Lord S. Randomised factorial trial of falls prevention among older people living in their own homes. *BMJ* 2002;325:128.
- Dey P, Bundred N, Gibbs A, Hopwood P, Baildam A, Boggis C, et al. Costs and benefits of a one stop clinic compared with a dedicated breast clinic: randomised controlled trial. *BMJ* 2002;324:507.
- Falk SJ, Girling DJ, White RJ, Hopwood P, Harvey A, Qian W, et al. Immediate versus delayed palliative thoracic radiotherapy in patients with unresectable locally advanced non-small cell lung cancer and minimal thoracic symptoms: randomised controlled trial. *BMJ* 2002;325:465.
- Girou E, Loyeau S, Legrand P, Oppein F, Brun-Buisson C. Efficacy of handrubbing with alcohol based solution versus standard handwashing with antiseptic soap: randomised clinical trial. *BMJ* 2002;325:362.
- Hajek P, Taylor TZ, Mills P. Brief intervention during hospital admission to help patients to give up smoking after myocardial infarction and bypass surgery: randomised controlled trial. *BMJ* 2002;324:87-9.

- Hermiz O, Comino E, Marks G, Daffurn K, Wilson S, Harris M. Randomised controlled trial of home based care of patients with chronic obstructive pulmonary disease. *BMJ* 2002;325:938.
- Hiscock H, Wake M. Randomised controlled trial of behavioural infant sleep intervention to improve infant sleep and maternal mood. *BMJ* 2002;324:1062-5.
- Howell CJ, Dean T, Lucking L, Dziedzic K, Jones PW, Johanson RB. Randomised study of long term outcome after epidural versus non-epidural analgesia during labour. *BMJ* 2002;325:357.
- Jarman B, Hurwitz B, Cook A, Bajekal M, Lee A. Effects of community based nurses specialising in Parkinson's disease on health outcome and costs: randomised controlled trial. *BMJ* 2002;324:1072-5.
- Kaczorowski M, Kaczorowski J. Ice cream evoked headaches (ICE-H) study: randomised trial of accelerated versus cautious ice cream eating regimen. *BMJ* 2002;325:1445-6.
- Kinley H, Czoski-Murray C, George S, McCabe C, Primrose J, Reilly C, et al. Effectiveness of appropriately trained nurses in preoperative assessment: randomised controlled equivalence/non-inferiority trial. *BMJ* 2002;325 :1323.
- Koning S, Suijlekom-Smit LW, Nouwen JL, Verduin CM, Bernsen RM, Oranje AP, et al. Fusidic acid cream in the treatment of impetigo in general practice: double blind randomised placebo controlled trial. *BMJ* 2002;324:203-6.
- Lenhardt R, Seybold T, Kimberger O, Stoiser B, Sessler DI. Local warming and insertion of peripheral venous cannulas: single blinded prospective randomised controlled trial and single blinded randomised crossover trial. *BMJ* 2002;325:409-10.
- Lewith GT, Watkins AD, Hyland ME, Shaw S, Broomfield JA, Dolan G, et al. Use of ultramolecular potencies of allergen to treat asthmatic people allergic to house dust mite: double blind randomised controlled clinical trial. *BMJ* 2002;324:520.
- Little P, Gould C, Moore M, Warner G, Dunleavey J, Williamson I. Predictors of poor outcome and benefits from antibiotics in children with acute otitis media: pragmatic randomised trial. *BMJ* 2002;325:22.
- Macfarlane J, Holmes W, Gard P, Thornhill D, Macfarlane R, Hubbard R. Reducing antibiotic use for acute bronchitis in primary care: blinded, randomised controlled trial of patient information leaflet. *BMJ* 2002;324:91-4.
- McCull KE, Murray LS, Gillen D, Walker A, Wirz A, Fletcher J, et al. Randomised trial of endoscopy with testing for *Helicobacter pylori* compared with non-invasive *H pylori* testing alone in the management of dyspepsia. *BMJ* 2002;324:999-1002.
- McGill N, O'Shaughnessy D, Pickering R, Herbertson M, Gill R. Mechanical methods of reducing blood transfusion in cardiac surgery: randomised controlled trial. *BMJ* 2002;324:1299.

- Meade T, Zuhrie R, Cook C, Cooper J. Bezafibrate in men with lower extremity arterial disease: randomised controlled trial. *BMJ* 2002;325:1139.
- Moore S, Corner J, Haviland J, Wells M, Salmon E, Normand C, et al. Nurse led follow up and conventional medical follow up in management of patients with lung cancer: randomised trial. *BMJ* 2002;325:1145.
- Multicentre Aneurysm Screening study group. Multicentre aneurysm screening study (MASS): cost effectiveness analysis of screening for abdominal aortic aneurysms based on four year results from randomised controlled trial. *BMJ* 2002;325:1135.
- Ng CS, Watson CJ, Palmer CR, See TC, Beharry NA, Housden BA, et al. Evaluation of early abdominopelvic computed tomography in patients with acute abdominal pain of unknown cause: prospective randomised study. *BMJ* 2002;325:1387.
- Quinn J, Cummings S, Callaham M, Sellers K. Suturing versus conservative management of lacerations of the hand: randomised controlled trial. *BMJ* 2002;325:299.
- Richards SC, Scott DL. Prescribed exercise in people with fibromyalgia: parallel group randomised controlled trial. *BMJ* 2002;325:185.
- Rowland D, DiGuseppi C, Roberts I, Curtis K, Roberts H, Ginnelly L, et al. Prevalence of working smoke alarms in local authority inner city housing: randomised controlled trial. *BMJ* 2002;325:998-1001.
- Schapowal A. Randomised controlled trial of butterbur and cetirizine for treating seasonal allergic rhinitis. *BMJ* 2002;324:144-6.
- Schumacher HR, Jr., Boice JA, Daikh DI, Mukhopadhyay S, Malmstrom K, Ng J, et al. Randomised double blind trial of etoricoxib and indometacin in treatment of acute gouty arthritis. *BMJ* 2002;324:1488-92.
- Taylor HR, Tikellis G, Robman LD, McCarty CA, McNeil JJ. Vitamin E supplementation and macular degeneration: randomised controlled trial. *BMJ* 2002;325:11.
- Thomas KS, Armstrong S, Avery A, Po AL, O'Neill C, Young S, et al. Randomised controlled trial of short bursts of a potent topical corticosteroid versus prolonged use of a mild preparation for children with mild or moderate atopic eczema. *BMJ* 2002;324:768.
- Thomas KS, Muir KR, Doherty M, Jones AC, O'Reilly SC, Bassey EJ. Home based exercise programme for knee pain and knee osteoarthritis: randomised controlled trial. *BMJ* 2002;325:752.
- Walker Z, Townsend J, Oakley L, Donovan C, Smith H, Hurst Z, et al. Health promotion for adolescents in primary care: randomised controlled trial. *BMJ* 2002;325:524.
- Ward K, Hilton P. Prospective multicentre randomised trial of tension-free vaginal tape and colposuspension as primary treatment for stress incontinence. *BMJ* 2002;325:67.

Williams C, Northstone K, Harrad RA, Sparrow JM, Harvey I. Amblyopia treatment outcomes after screening before or at age 3 years: follow up from randomised trial. *BMJ* 2002;324:1549.

Zamvar V, Williams D, Hall J, Payne N, Cann C, Young K, et al. Assessment of neurocognitive impairment after off-pump and on-pump techniques for coronary artery bypass graft surgery: prospective randomised controlled trial. *BMJ* 2002;325:1268.

## **Models of clustering and their implementation**

### **(a) The independence model**

$$y_i \sim \text{Binomial}(1, \pi_i)$$

$$\text{logit}(\pi_i) = \alpha + \beta t_i \quad (1)$$

where  $y_i$  = the outcome for the  $i$ th patient

$\pi_i$  = probability of being offered a follow-up appointment

$t_i$  = indicator for intervention (1= teleconsultation, 0=control)

$\alpha$  = mean outcome (log odds of a follow-up appointment) in the control group

$\beta$  = intervention effect (log odds ratio of a follow-up appointment in the teleconsultation group compared to the control).

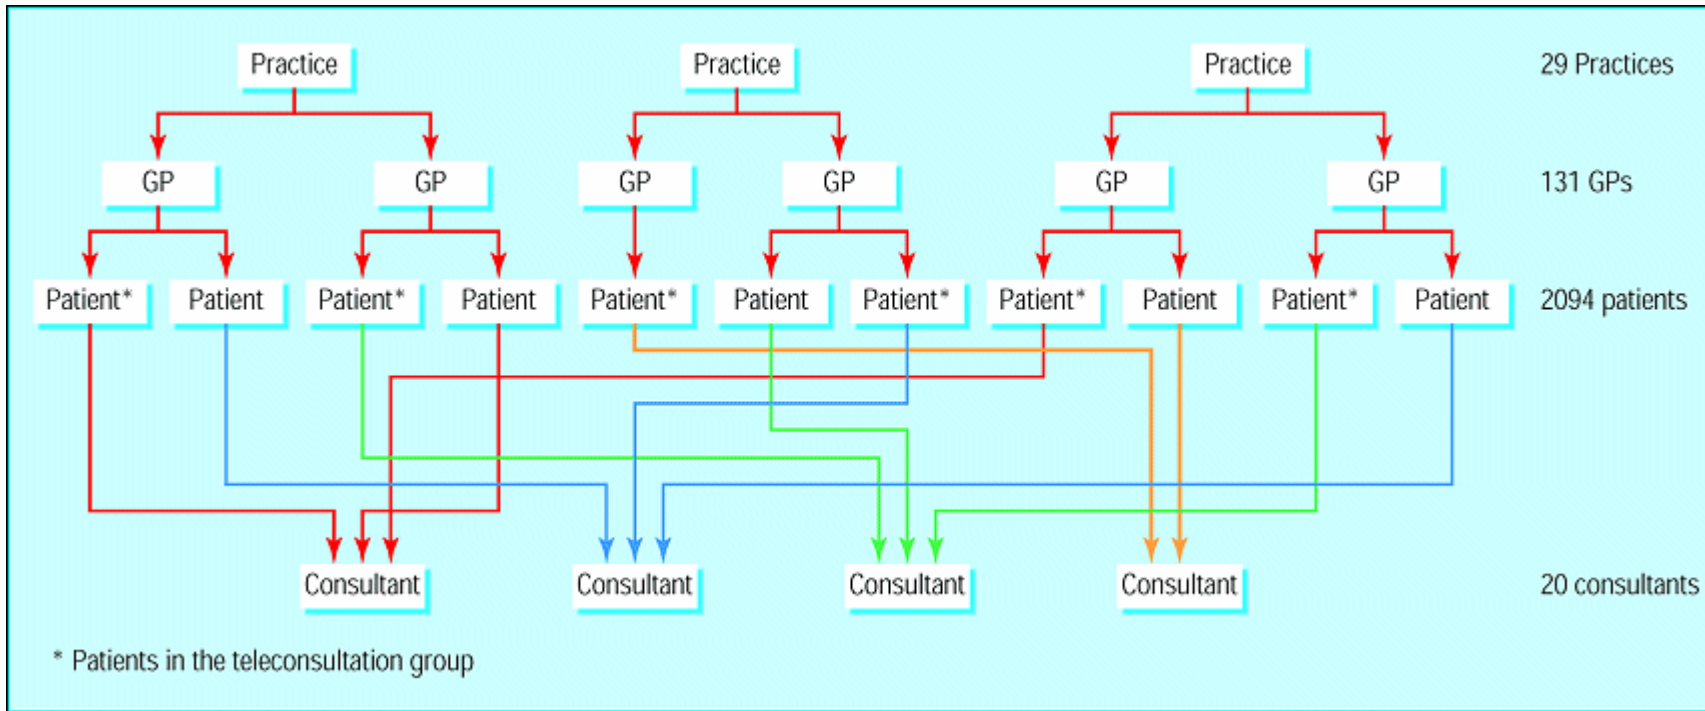

The model assumes that all observations are independent.

**(b) Clustering of the outcomes**

$$\begin{aligned}
 y_{ij} &\sim \text{Binomial}(1, \pi_{ij}) \\
 \text{logit}(\pi_{ij}) &= \alpha + \beta t_{ij} + u_j \\
 u_j &\sim \text{Normal}(0, \sigma_u^2)
 \end{aligned}
 \tag{2}$$

where  $y_{ij}$  = response of the  $i$ th patient in the  $j$ th cluster

$u_j$  = random effect of the  $j$ th cluster

$\sigma_u^2$  = between cluster variance

This model adjusts for clustering by the inclusion of a random effect. It allows responses to vary by cluster but assumes that the variability in the cluster effects is the same in both treatment groups, hence giving a pooled estimate of the between cluster variance. It also assumes that the intervention effect is the same across all clusters.

**(c) Clustering of the intervention effects**

$$\begin{aligned}
 y_{ij} &\sim \text{Binomial}(1, \pi_{ij}) \\
 \text{logit}(\pi_{ij}) &= \alpha + \beta t_{ij} + u_{aj} + u_{bj} t_{ij} \\
 \begin{pmatrix} u_{aj} \\ u_{bj} \end{pmatrix} &\sim \text{Bivariate Normal} \left( \begin{pmatrix} 0 \\ 0 \end{pmatrix}, \begin{pmatrix} \sigma_a^2 & \sigma_{ab} \\ \sigma_{ab} & \sigma_b^2 \end{pmatrix} \right) \quad (3)
 \end{aligned}$$

where  $u_{aj}$  = random effect in the  $j$ th cluster across all patients

$u_{bj}$  = treatment-by-cluster interaction for the  $j$ th cluster

$\sigma_a^2$  = between cluster variance in the outcomes

$\sigma_b^2$  = between cluster variance in the intervention effect

$\sigma_{ab}$  = correlation between the two

This is an extension to the model in equation (2) that fits two random effects, one across all patients, and a second in the teleconsultation group only representing the treatment-by-cluster interaction. This model allows the intervention effect, as well as the outcomes, to vary over clusters. It can also be thought of as allowing the variability between clusters to be different in the two intervention arms.

A similar model can be used where the clustering is imposed and each cluster is only in one intervention group, hence nested within treatment groups. In this case there is no correlation between the two random effects. Equivalently the random effects can be modelled by two independent normal distributions.

**(d) Model fitting**

The models were fitted using a classical approach in MLwiN<sup>w1</sup> and a Bayesian approach in WinBUGS.<sup>w2</sup> These gave similar results, and only the Bayesian results have been reported here. Vague priors were chosen for all parameters so that they had little influence on the results obtained: Normal(0,1000) priors for regression parameters, Uniform(0,10) priors for standard deviations (square root of variance terms) and Uniform(-1, 1) for the correlation between the random effects, as suggested by Turner, et al.<sup>w3</sup>

## Full results from the fitted models

Table A1 gives the estimates of the between cluster variances (BCV) for the models discussed which allow for the heterogeneity in the outcome and the intervention effect between clusters. It also includes the deviance information criteria (DIC), which is a Bayesian measure used for model selection that trades-off model complexity and fit.<sup>w4</sup>

The BCV of 0.23 for the clustering of the outcomes model represents a standard deviation of 0.48. So the 95% range of the intercept term (log odds) across consultants is  $-0.34 \pm 2 \times 0.48 = -1.30$  to 0.62; this corresponds to a wide range of probabilities from 0.21 to 0.65, compatible with Figure 3a. More importantly, the BCV of 0.71 for the clustering of the intervention effects represents a standard deviation of 0.84. So the 95% range of intervention effects (log odds ratios) across consultants is  $0.31 \pm 2 \times 0.84$ ; this corresponds to a wide range of odds ratios from 0.25 to 7.3, as seen in Figure 3b. This variation between the clusters explains the difference in the estimate of the overall odds ratio and, in particular, the inflated width of the confidence interval when the clustering is taken into account.

The heterogeneity in the outcomes and the intervention effects can also be seen in the DIC, which is substantially reduced when clustering is taken into account; the models allowing for clustering are therefore more appropriate for the data.

**Table A1 Between cluster variances (BCV), their standard errors, and the deviance information criteria (DIC), from the models fitted to the telemedicine trial data**

|                                 | <b>Assuming independence</b> | <b>Clustering of the outcomes</b> | <b>Clustering of the intervention effect</b> |
|---------------------------------|------------------------------|-----------------------------------|----------------------------------------------|
| BCV for the outcomes            | NA                           | 0.23 (0.14)                       | 0.39 (0.24)                                  |
| BCV for the intervention effect | NA                           | NA                                | 0.71 (0.40)                                  |
| Correlation                     | NA                           | NA                                | -0.25 (0.24)                                 |
| DIC                             | 2661.5                       | 2614.6                            | 2556.0                                       |

NA = not applicable

## References

w1. MLwiN: <http://multilevel.ioe.ac.uk/index.html>. 2003.

- w2. Spiegelhalter DJ, Thomas A, Best NG, and Lunn D. WinBUGS Version 1.3 User manual. Cambridge: Medical Research Council Biostatistics Unit (Available from <http://www.mrc-bsu.cam.ac.uk/bugs/>). BUGS website . 2000.
- w3. Turner RM, Omar RZ, Thompson SG. Bayesian methods of analysis for cluster randomised trials with binary outcome data. *Statistics in Medicine* 2001;20:453-72.
- w4. Spiegelhalter DJ, Best NG, Carlin BP, Linde AVD. Bayesian models of complexity and fit. *Journal of the Royal Statistical Society Series B* 2003;64:583-639.
